# Supplementary material
Source: PubMed Central journal article supplement (PMC8693692)
Supplement: NEJMoa2116185_data-sharing.pdf [file NEJMoa2116185_data-sharing.pdf]

## Data Sharing Statement

Dunkle LM, Kotloff KL, Gay CL, et al. Efficacy and Safety of NVX-CoV2373 in Adults in the United States and Mexico. N Engl J Med. DOI: 10.1056/NEJMoa2116185.

| Question                                                            | Authors' Response                                                                                             |
|---------------------------------------------------------------------|---------------------------------------------------------------------------------------------------------------|
| Will the data collected for your study be made available to others? | Yes                                                                                                           |
| Would you like to offer context for your decision?                  | —                                                                                                             |
| Which data?                                                         | Other (eg, partial data sets)                                                                                 |
| Additional information about data                                   | <a href="https://clinicaltrials.gov/ct2/show/NCT04611802">https://clinicaltrials.gov/ct2/show/NCT04611802</a> |
| How or where can the data be obtained?                              | <a href="https://clinicaltrials.gov/ct2/show/NCT04611802">https://clinicaltrials.gov/ct2/show/NCT04611802</a> |
| When will data availability begin?                                  | With publication                                                                                              |
| When will data availability end?                                    | —                                                                                                             |
| Will any supporting documents be available?                         | —                                                                                                             |
| Which supporting documents?                                         | Analytic/Statistical code                                                                                     |
| Additional information about supporting documents                   | —                                                                                                             |
| How or where can supporting documents be obtained?                  | —                                                                                                             |
| When will supporting documents availability begin?                  | —                                                                                                             |
| When will supporting documents availability end?                    | —                                                                                                             |
| To whom will data be available?                                     | —                                                                                                             |
| For what type of analysis or purpose?                               | —                                                                                                             |
| By what mechanism?                                                  | —                                                                                                             |
| Any other restrictions?                                             | —                                                                                                             |
| Additional information                                              | No                                                                                                            |

This statement was posted on December 15, 2021, at NEJM.org.
